# Supplementary material
Source: HighWire-hosted journal article supplement (http://jmg.bmj.com/highwire/filestream/160450/field_highwire_adjunct_files/1/JMG_SupTab2_088310.xls)
Supplement: JMG_SupTab2_088310.xls [file JMG_SupTab2_088310.xls]

## Sheet: Sheet1
	Table 2. Top SNPs resulting from the mixed-model analysis for PC1, PC2 and PC3
	PC1
	name	chromosome	position	effect allele	direction of effect	p	λ	Gene region
	rs2687481	7	125656358	t	------	3.22e-07	0.972786	GRM8
	rs2521030	7	125656552	c	------	4.56e-07	0.972786	GRM8
	rs2687479	7	125655251	a	++++++	4.87e-07	0.972786	GRM8
	rs1673365	7	125677843	t	------	1.45e-06	0.972786	GRM8
	rs1673369	7	125684818	t	++++++	1.46e-06	0.972786	GRM8
	rs1719089	7	125675233	t	------	1.5e-06	0.972786	GRM8
	rs1719090	7	125672107	t	------	1.57e-06	0.972786	GRM8
	rs1719091	7	125671577	a	------	1.58e-06	0.972786	GRM8
	rs1719093	7	125671126	t	++++++	1.6e-06	0.972786	GRM8
	rs1673373	7	125660694	a	++++++	1.87e-06	0.972786	GRM8
	rs6544889	2	46430803	a	+-----	2.18e-06	0.972786	EPAS1
	rs6544887	2	46430716	t	-+++++	2.18e-06	0.972786	EPAS1
	rs6544888	2	46430769	a	-+++++	2.19e-06	0.972786	EPAS1
	rs1562452	2	46433948	a	+-----	2.61e-06	0.972786	EPAS1
	rs11671149	19	58862280	t	++??++	2.95e-06	0.972786	DPRX
	rs585747	11	79377793	a	------	3.08e-06	0.972786
	rs3765620	11	102100702	a	++++++	3.35e-06	0.972786	MMP27; MMP8
	rs1036987	17	72403766	a	++++++	3.45e-06	0.972786	MGAT5B
	rs6756667	2	46432913	a	++++++	3.73e-06	0.972786	EPAS1
	rs1562453	2	46433978	t	++++++	3.76e-06	0.972786	EPAS1
	rs4953356	2	46432428	t	------	3.79e-06	0.972786	EPAS1
	rs17705835	15	91463287	t	?--?--	3.82e-06	0.972786	RGMA; CHD2
	rs6743991	2	46436739	a	------	4.27e-06	0.972786	EPAS1
	rs6735812	2	46434578	c	++++++	4.47e-06	0.972786	EPAS1
	rs4953358	2	46434957	c	++++++	4.56e-06	0.972786	EPAS1
	rs4953359	2	46435147	t	------	4.63e-06	0.972786	EPAS1
	rs10848114	12	129545308	t	------	4.75e-06	0.972786	RIMBP2
	rs6585804	10	123970098	a	------	5.33e-06	0.972786	TACC2
	rs17687720	13	101410000	a	++++++	5.76e-06	0.972786	FGF14
	rs7987221	13	101409767	a	++++++	5.77e-06	0.972786	FGF14
	rs17687714	13	101409041	a	++++++	5.78e-06	0.972786	FGF14
	rs17687732	13	101410068	a	++++++	5.83e-06	0.972786	FGF14
	rs17631289	13	101410431	a	++++++	6.35e-06	0.972786	FGF14
	rs12430805	13	101410771	t	------	6.5e-06	0.972786	FGF14
	rs1073341	7	125651040	a	------	6.52e-06	0.972786	GRM8
	rs12430821	13	101410824	a	------	6.66e-06	0.972786	FGF14
	rs6742663	2	20258641	a	++++++	6.68e-06	0.972786	SDC1
	rs4772428	13	101411719	c	++++++	6.74e-06	0.972786	FGF14
	rs12427431	13	101412944	t	------	6.88e-06	0.972786	FGF14
	rs17631205	13	101405423	t	++++++	6.89e-06	0.972786	FGF14
	rs12856393	13	101413146	a	------	7.02e-06	0.972786	FGF14
	rs12427457	13	101413321	a	------	7.07e-06	0.972786	FGF14
	rs6707241	2	46438356	t	+-----	7.32e-06	0.972786	EPAS1
	rs6740096	2	46439392	a	-+++++	7.34e-06	0.972786	EPAS1
	rs4350703	2	20263750	a	------	7.35e-06	0.972786	SDC1
	rs6756290	2	20259092	t	------	7.98e-06	0.972786	SDC1
	rs10191091	2	46426714	t	+-----	8.15e-06	0.972786	EPAS1
	rs2348475	2	20260595	t	------	8.28e-06	0.972786	SDC1
	rs11895809	2	20262535	a	------	8.3e-06	0.972786	SDC1
	rs978091	14	42414308	a	---?--	8.86e-06	0.972786
	rs7182802	15	24929952	t	---+--	9.94e-06	0.972786	GABRG3
	PC2
	name	chromosome	position	effallele	direction of effect	p	λ	Gene region
	rs7212433	17	27107800	t	------	2.066e-07	0.984173	SUZ12; LRRC37B; C17orf79; RAB11FIP4; UTP6
	rs11219981	11	124614837	a	---?--	2.858e-07	0.984173	PKNOX2
	rs10790729	11	124605332	t	+++?++	5.959e-07	0.984173	PKNOX2
	rs6669265	1	27233806	a	++++++	5.967e-07	0.984173	C1orf172; FAM46B; SFN; ZDHHC18; ATPBD1B; NUDC; LOC388610; NR0B2; PIGV; ARID1A; GPATCH3
	rs2276957	4	122480925	t	------	4.851e-06	0.984173	GPR103
	rs1952587	14	56230970	a	+++?++	4.982e-06	0.984173	C14orf101; OTX2
	rs12499677	4	122482588	a	------	5.05e-06	0.984173	GPR103
	rs10857080	4	122483595	a	++++++	5.087e-06	0.984173	GPR103
	rs3783041	13	59486892	a	??----	5.135e-06	0.984173	DIAPH3
	rs3783040	13	59486531	t	??----	5.183e-06	0.984173	DIAPH3
	rs17864603	2	51842904	t	--+---	5.274e-06	0.984173
	rs11843015	13	59485201	t	??++++	5.282e-06	0.984173	DIAPH3
	rs11219971	11	124584492	t	++++++	5.346e-06	0.984173	PKNOX2
	rs11841515	13	59476294	t	??++++	5.83e-06	0.984173	DIAPH3
	rs13144655	4	122488810	t	------	6.566e-06	0.984173	GPR103
	rs928108	14	56240227	a	---?--	7.452e-06	0.984173	C14orf101; OTX2
	rs11842701	13	59329690	a	??----	7.766e-06	0.984173	DIAPH3
	rs4240259	4	122489943	t	++++++	7.889e-06	0.984173	GPR103
	rs11844009	13	59336501	t	??----	8.738e-06	0.984173	DIAPH3
	rs10790728	11	124583221	t	++++-+	8.91e-06	0.984173	PKNOX2
	rs17292288	9	128098321	t	+++?++	8.952e-06	0.984173	FAM125B
	rs10893349	11	124581125	t	----+-	8.988e-06	0.984173	PKNOX2
	rs913741	14	56241026	a	---?--	9.279e-06	0.984173	C14orf101; OTX2
	rs17091976	14	56239864	a	---?--	9.759e-06	0.984173	C14orf101; OTX2
	PC3
	name	chromosome	position	effallele	direction of effect	p	λ	Gene region
	rs712932	1	99424088	c	------	2.32e-07	0.985171	PAP2D; LPPR4
	rs712934	1	99421564	a	------	2.33e-07	0.985171	PAP2D; LPPR4
	rs712931	1	99426756	t	------	2.38e-07	0.985171	PAP2D; LPPR4
	rs819786	1	99427115	a	------	2.39e-07	0.985171	PAP2D; LPPR4
	rs819785	1	99428208	a	------	2.41e-07	0.985171	PAP2D; LPPR4
	rs712936	1	99419627	t	++++++	2.84e-07	0.985171	PAP2D; LPPR4
	rs712937	1	99418034	a	++++++	3.15e-07	0.985171	PAP2D; LPPR4
	rs664835	1	99436556	a	------	4.74e-07	0.985171	PAP2D; LPPR4
	rs819778	1	99437774	a	++++++	5e-07	0.985171	PAP2D; LPPR4
	rs645441	1	99442645	t	++++++	5.65e-07	0.985171	PAP2D; LPPR4
	rs687101	1	99410160	a	------	6.25e-07	0.985171	PAP2D; LPPR4
	rs638723	1	99414257	a	++++++	6.59e-07	0.985171	PAP2D; LPPR4
	rs685267	1	99443937	a	++++++	8.37e-07	0.985171	PAP2D; LPPR4
	rs668206	1	99416551	t	------	9.64e-07	0.985171	PAP2D; LPPR4
	rs11485142	1	216899837	a	+++?++	1.41e-06	0.985171	TGFB2
	rs604876	1	99413608	t	++++++	1.91e-06	0.985171	PAP2D; LPPR4
	rs305256	8	137637434	t	++++++	2.37e-06	0.985171
	rs3911410	1	99432733	a	++++++	2.44e-06	0.985171	PAP2D; LPPR4
	rs2581561	8	137614330	t	++++++	3.48e-06	0.985171
	rs621215	1	99392012	a	------	3.73e-06	0.985171	PAP2D; LPPR4
	rs305255	8	137638184	a	------	3.95e-06	0.985171
	rs305261	8	137631213	t	------	3.98e-06	0.985171
	rs6756828	2	174627435	t	--+?--	4.23e-06	0.985171	OLA1; SP3
	rs2587847	8	137624757	t	++++++	4.28e-06	0.985171
	rs305290	8	137655983	t	------	4.4e-06	0.985171
	rs305289	8	137656252	t	------	4.49e-06	0.985171
	rs2119234	8	137621985	t	++++++	4.53e-06	0.985171
	rs305288	8	137656556	t	++++++	4.56e-06	0.985171	CCDC81
	rs587509	1	99388302	t	------	4.86e-06	0.985171	PAP2D; LPPR4
	rs7123014	11	85600090	a	------	4.95e-06	0.985171	C11orf73; EED; MBIP
	rs305286	8	137661228	a	++++++	5.23e-06	0.985171
	rs10130121	14	35694502	t	+++?++	5.89e-06	0.985171	BRMS1L; GARNL1; MBIP
	rs594821	18	74846577	t	+++?++	6.07e-06	0.985171	SALL3; MBIP
	rs17461837	14	35714081	t	+++?++	6.29e-06	0.985171	BRMS1L; GARNL1
	rs10137274	14	35714290	a	---?--	6.35e-06	0.985171	BRMS1L; GARNL1
	rs305231	8	137673287	t	------	7.76e-06	0.985171
	rs305237	8	137677000	a	++++++	8.53e-06	0.985171	MBIP
	rs305244	8	137684388	a	++++++	8.97e-06	0.985171
	rs10139184	14	35719798	t	+++?++	9.57e-06	0.985171	BRMS1L; GARNL1
	rs305249	8	137688139	t	++++++	9.68e-06	0.985171
	rs863686	1	99382741	a	++++-+	9.73e-06	0.985171	PAP2D; LPPR4
